# Supplementary material for: Compositional transferability of deep potential in molten LiF–BeF2 and LaF3 mixtures: prediction of density, viscosity, and local structure
Source: Royal Society of Chemistry journal article supplement (doi:10.1039/d4cp00079j), 2024-01-01
Supplement: d4cp00079j1.pdf [file d4cp00079j1.pdf]

## Supporting Information

### Compositional transferability of deep potential in molten LiF-BeF<sub>2</sub> and LaF<sub>3</sub> mixtures: Prediction of density, viscosity, and local structure

Xuejiao Li\*, Tingrui Xu, Yu Gong\*

<sup>a</sup> Shanghai Institute of Applied Physics, Chinese Academy of Sciences, Shanghai 201800, China

<sup>b</sup> University of Chinese Academy of Sciences, Beijing 100049, China

#### S1. RMSEs of energy and force

In **Fig. S1**, the energy and force of molten Flibe+LaF<sub>3</sub> achieve convergence after 1,000,000 training steps, and average RMSEs of the last 5000 training steps for energy and force are 1.9 meV atoms<sup>-1</sup> and  $3.5 \times 10^{-2}$  eV Å<sup>-1</sup>, respectively.

---

\*Corresponding authors.

E-mails: [lixuejiao@sinap.ac.cn](mailto:lixuejiao@sinap.ac.cn); [gongyu@sinap.ac.cn](mailto:gongyu@sinap.ac.cn)

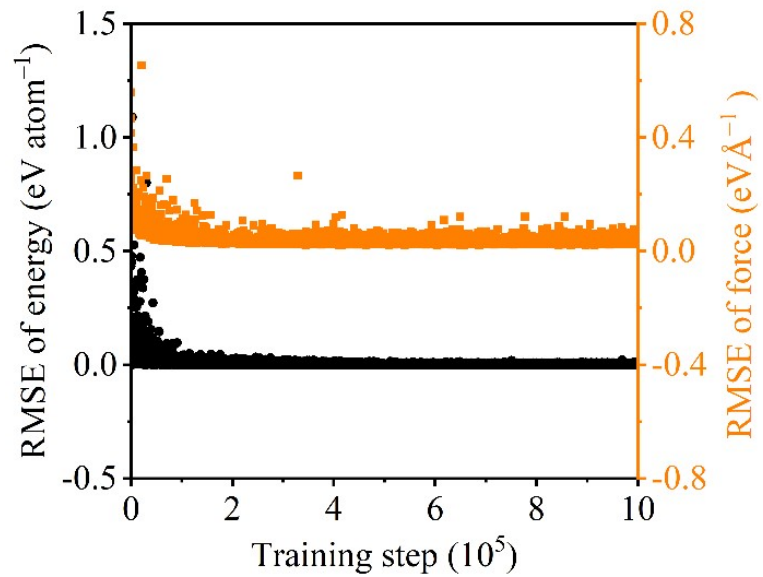

**Fig. S1** RMSEs of energy (black points) and force (orange points) for molten Flibe+LaF<sub>3</sub> in the training stage

## S2. DPMD simulated MSDs and RDFs

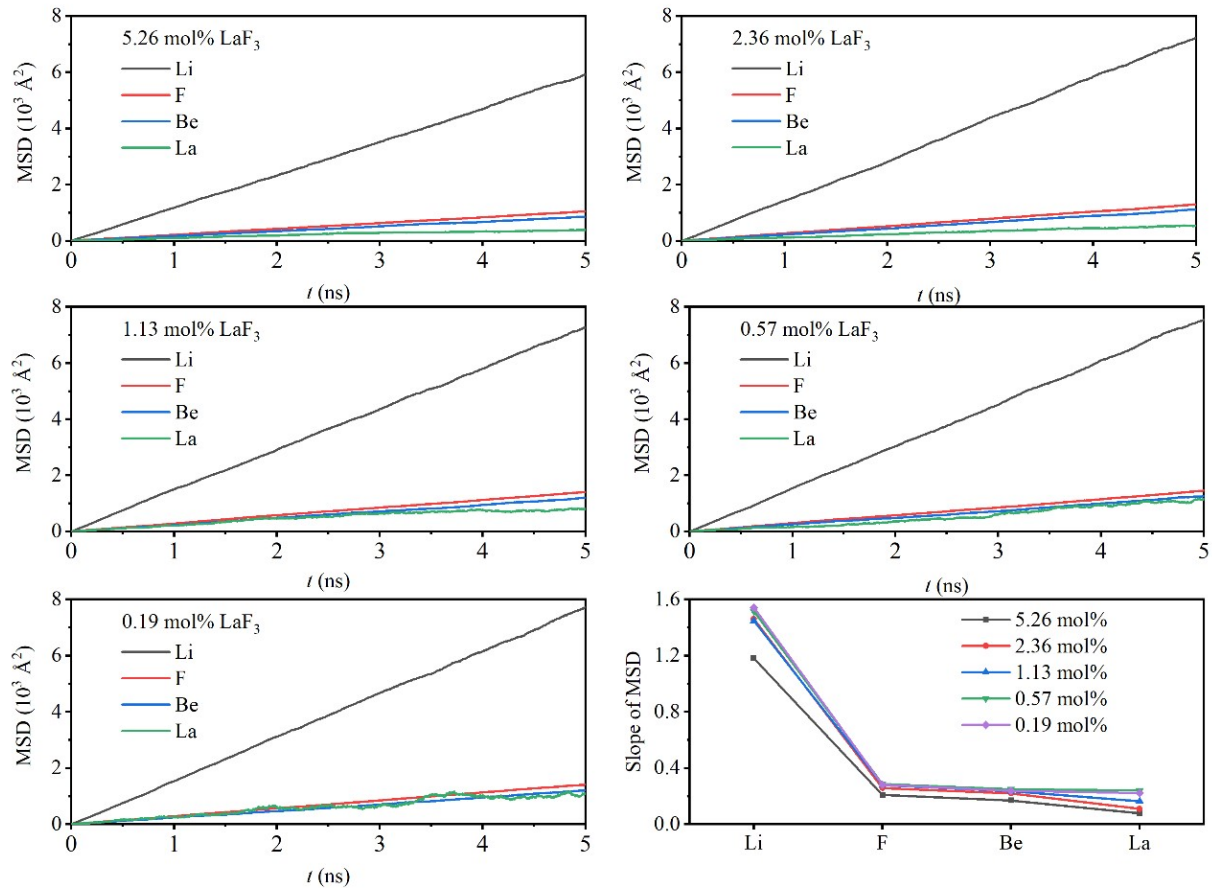

**Fig. S2** MSDs of molten Flibe+LaF<sub>3</sub> at different LaF<sub>3</sub> concentrations and the slopes of MSDs

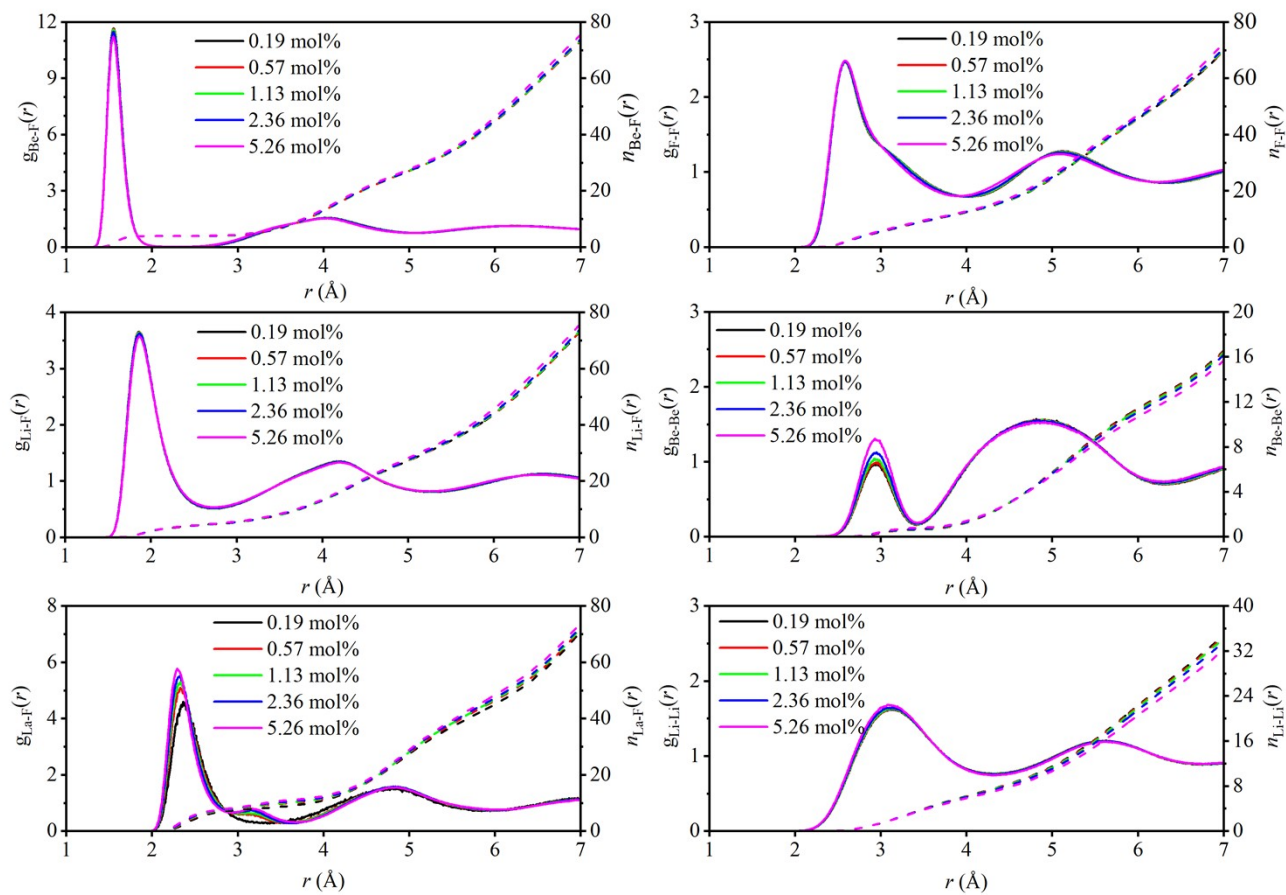

**Fig. S3** RDFs and their integral curves of Be-F, Li-F, La-F, F-F, Be-Be, and Li-Li for molten

$\text{Flibe} + x\text{LaF}_3$
